# Supplementary material for: A Health Impact and Economic Loss Assessment of O3 and PM2.5 Exposure in China From 2015 to 2020
Source: PubMed Central journal article supplement — Geohealth. 2022 Mar 1;6(3):e2021GH000531. doi: 10.1029/2021GH000531 (PMC8950782; doi:10.1029/2021gh000531), 2022-03-01
Supplement: GH2-6-e2021GH000531-s001.pdf [file GH2-6-e2021GH000531-s001.pdf]

# AGU PUBLICATIONS

Supporting Information for

## **A health impact and economic losses assessment of O<sub>3</sub> and PM<sub>2.5</sub> exposure in China from 2015–2020**

Xiangxue Zhang<sup>1,2</sup>, Changxiu Cheng<sup>1,2,3,\*</sup>, Hui Zhao<sup>4,\*</sup>

<sup>1</sup>State Key Laboratory of Earth Surface Processes and Resource Ecology, Beijing Normal University, Beijing, 100875, China, <sup>2</sup>Key Laboratory of Environmental Change and Natural Disaster, Ministry of Education, Beijing Normal University, Beijing, 100875, China, <sup>3</sup>National Tibetan Plateau Data Center, Beijing 100101, China, <sup>4</sup>Department of Environmental Science and Engineering, Fudan University, Shanghai, 200438, China

\*Correspondence: [chengcx@bnu.edu.cn](mailto:chengcx@bnu.edu.cn) (C.X.); [zhaohui\\_nuist@163.com](mailto:zhaohui_nuist@163.com) (H.Z.)

### **Contents of this file**

This file provides additional information to the main manuscript.

#### **Figures**

**Figure S1.** Spatiotemporal distributions of total mortality, cardiovascular mortality, and respiratory mortality caused by long-term O<sub>3</sub> exposure.

**Figure S2.** Spatiotemporal distribution of the differences of health impact related to long-term O<sub>3</sub> exposure in 2016-2020 relative to 2015.

**Figure S3.** Spatiotemporal distributions of total mortality, cardiovascular mortality, and respiratory mortality caused by long-term PM<sub>2.5</sub> exposure.

**Figure S4.** Spatiotemporal distribution of the differences of health impact related to long-term PM<sub>2.5</sub> exposure in 2016-2020 relative to 2015.

**Figure S5.** Spatiotemporal distribution of economic loss (10<sup>3</sup>) for cardiovascular and respiratory mortality attributable to O<sub>3</sub> and PM<sub>2.5</sub> exposure from 2015 to 2020.

**Figure S6.** Spatiotemporal distribution of annual average economic loss (10<sup>3</sup>) for cardiovascular and respiratory mortality attributable to O<sub>3</sub> and PM<sub>2.5</sub> exposure during 2015-2020.

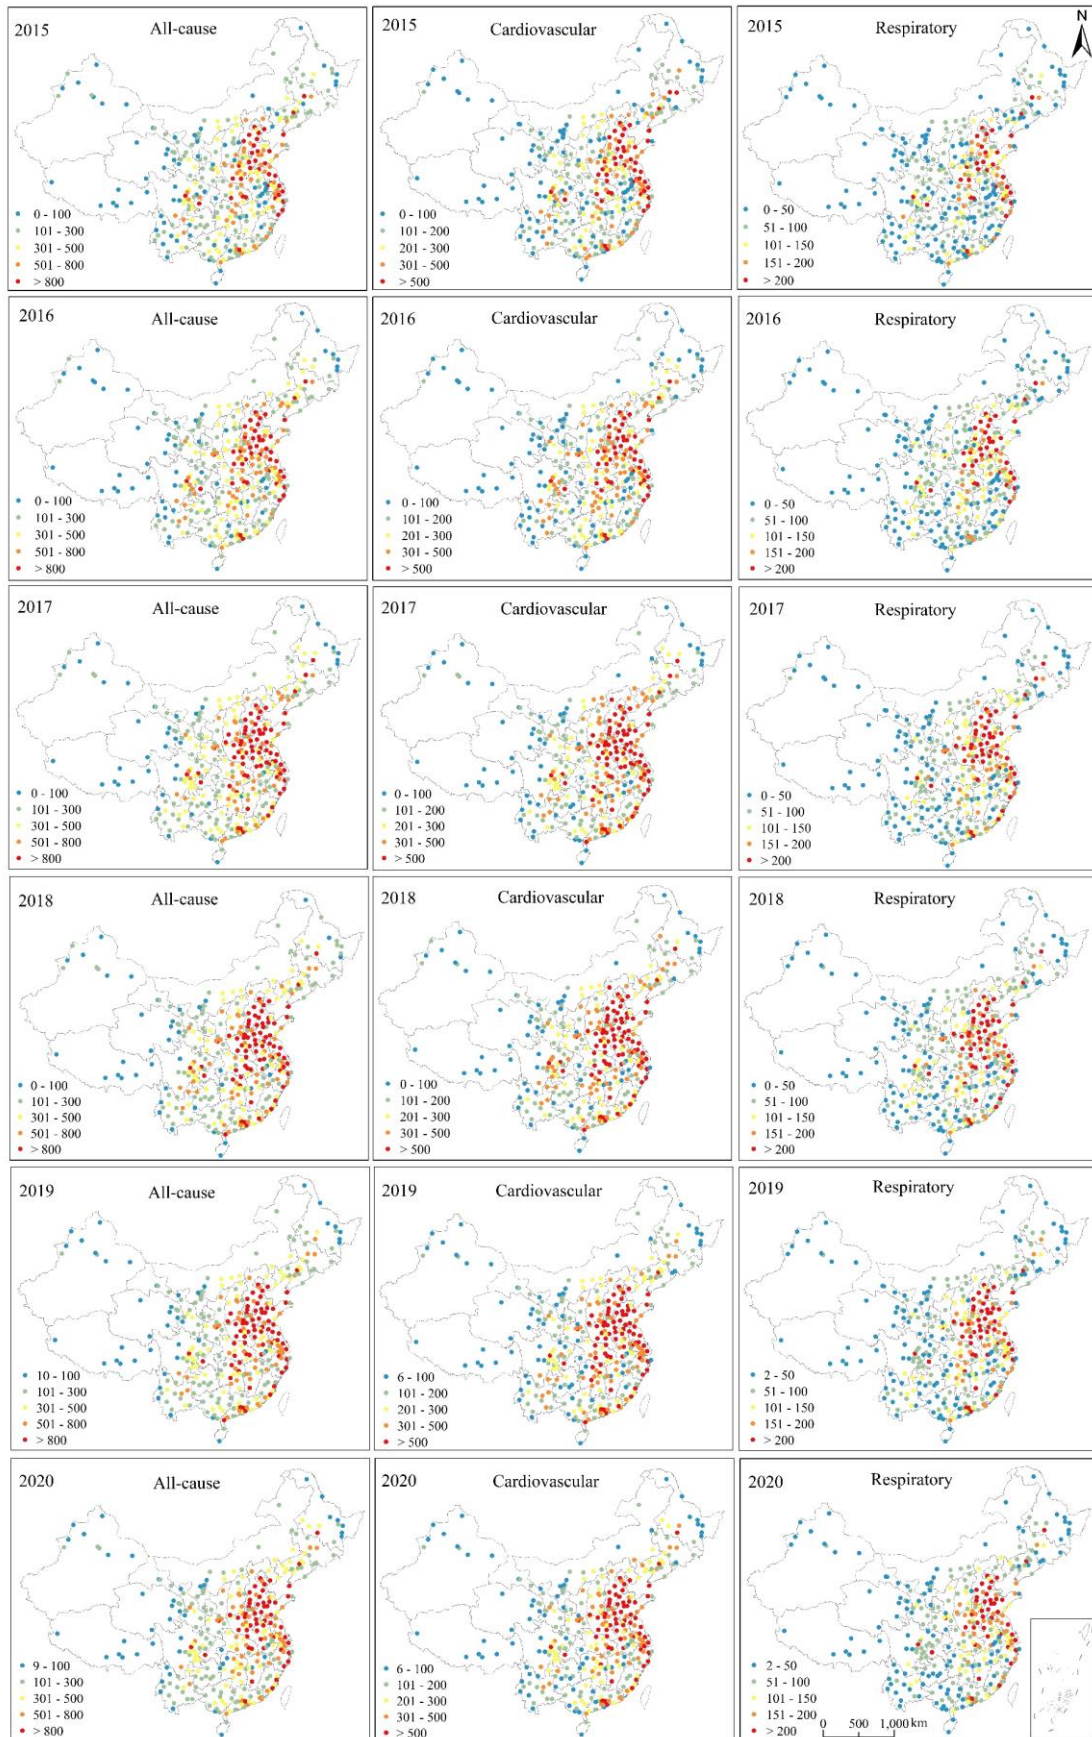

**Figure S1.** Spatiotemporal distributions of total mortality, cardiovascular mortality, and respiratory mortality caused by long-term O<sub>3</sub> exposure.

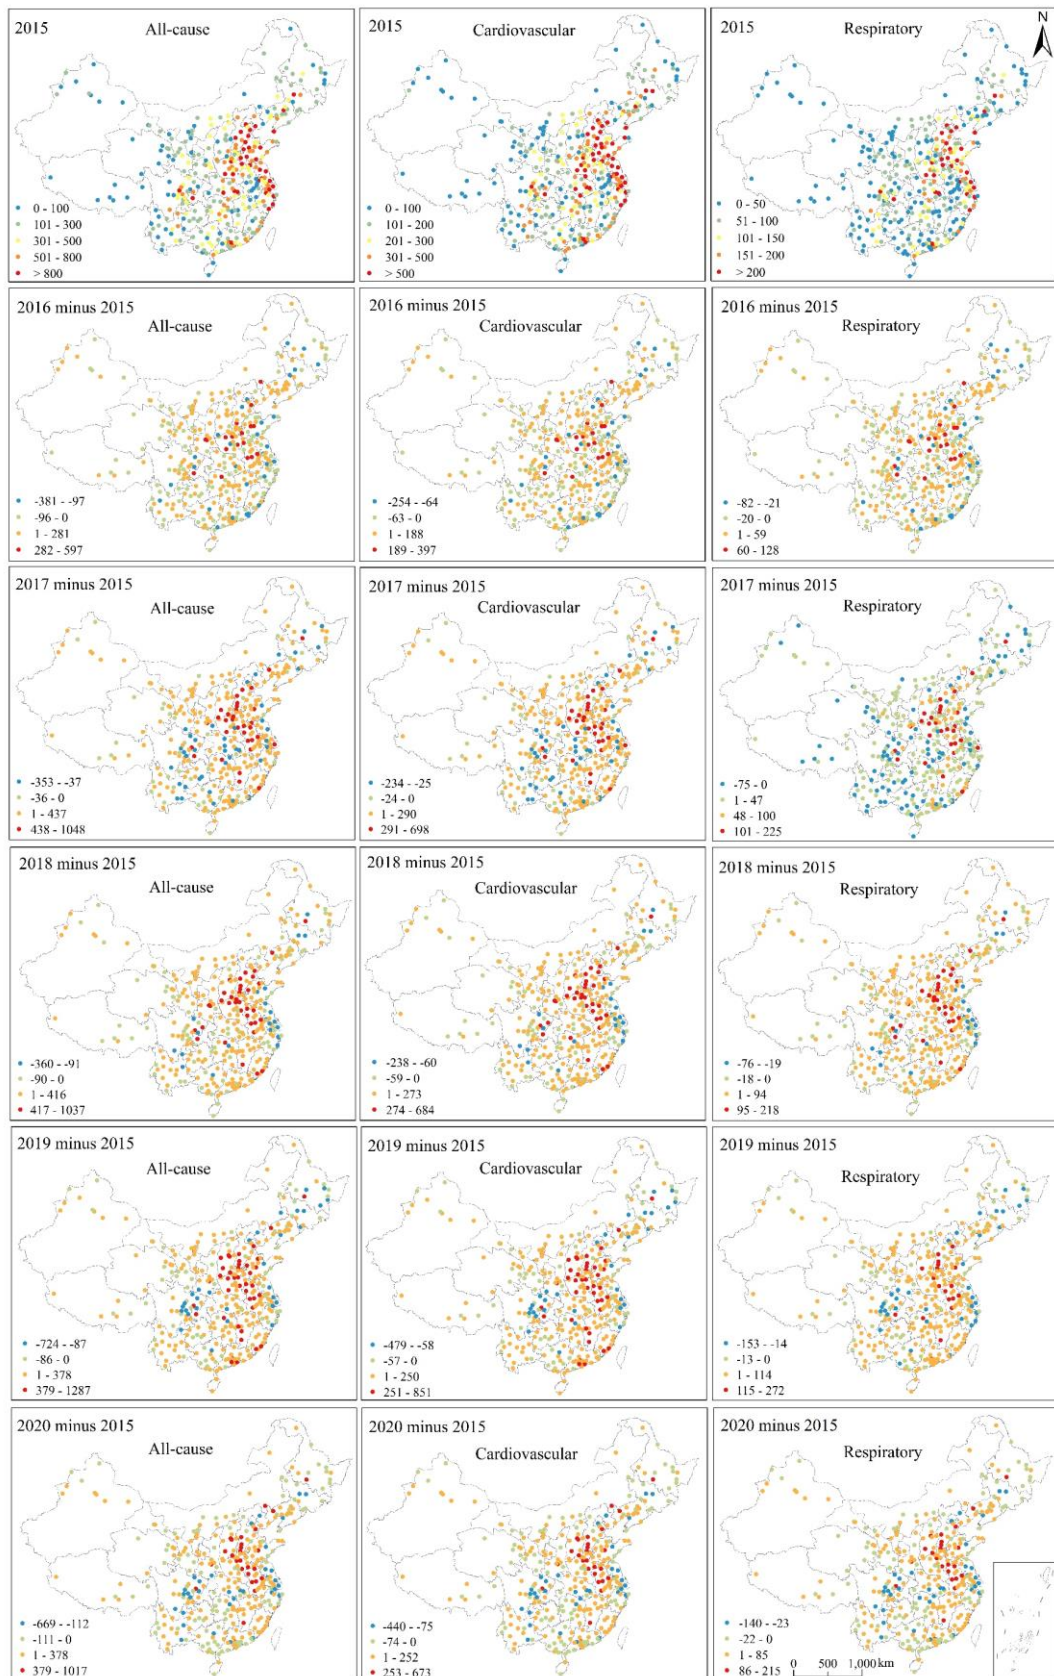

**Fig S2.** Spatiotemporal distribution of the differences of health impact related to long-term O<sub>3</sub> exposure in 2016-2020 relative to 2015.

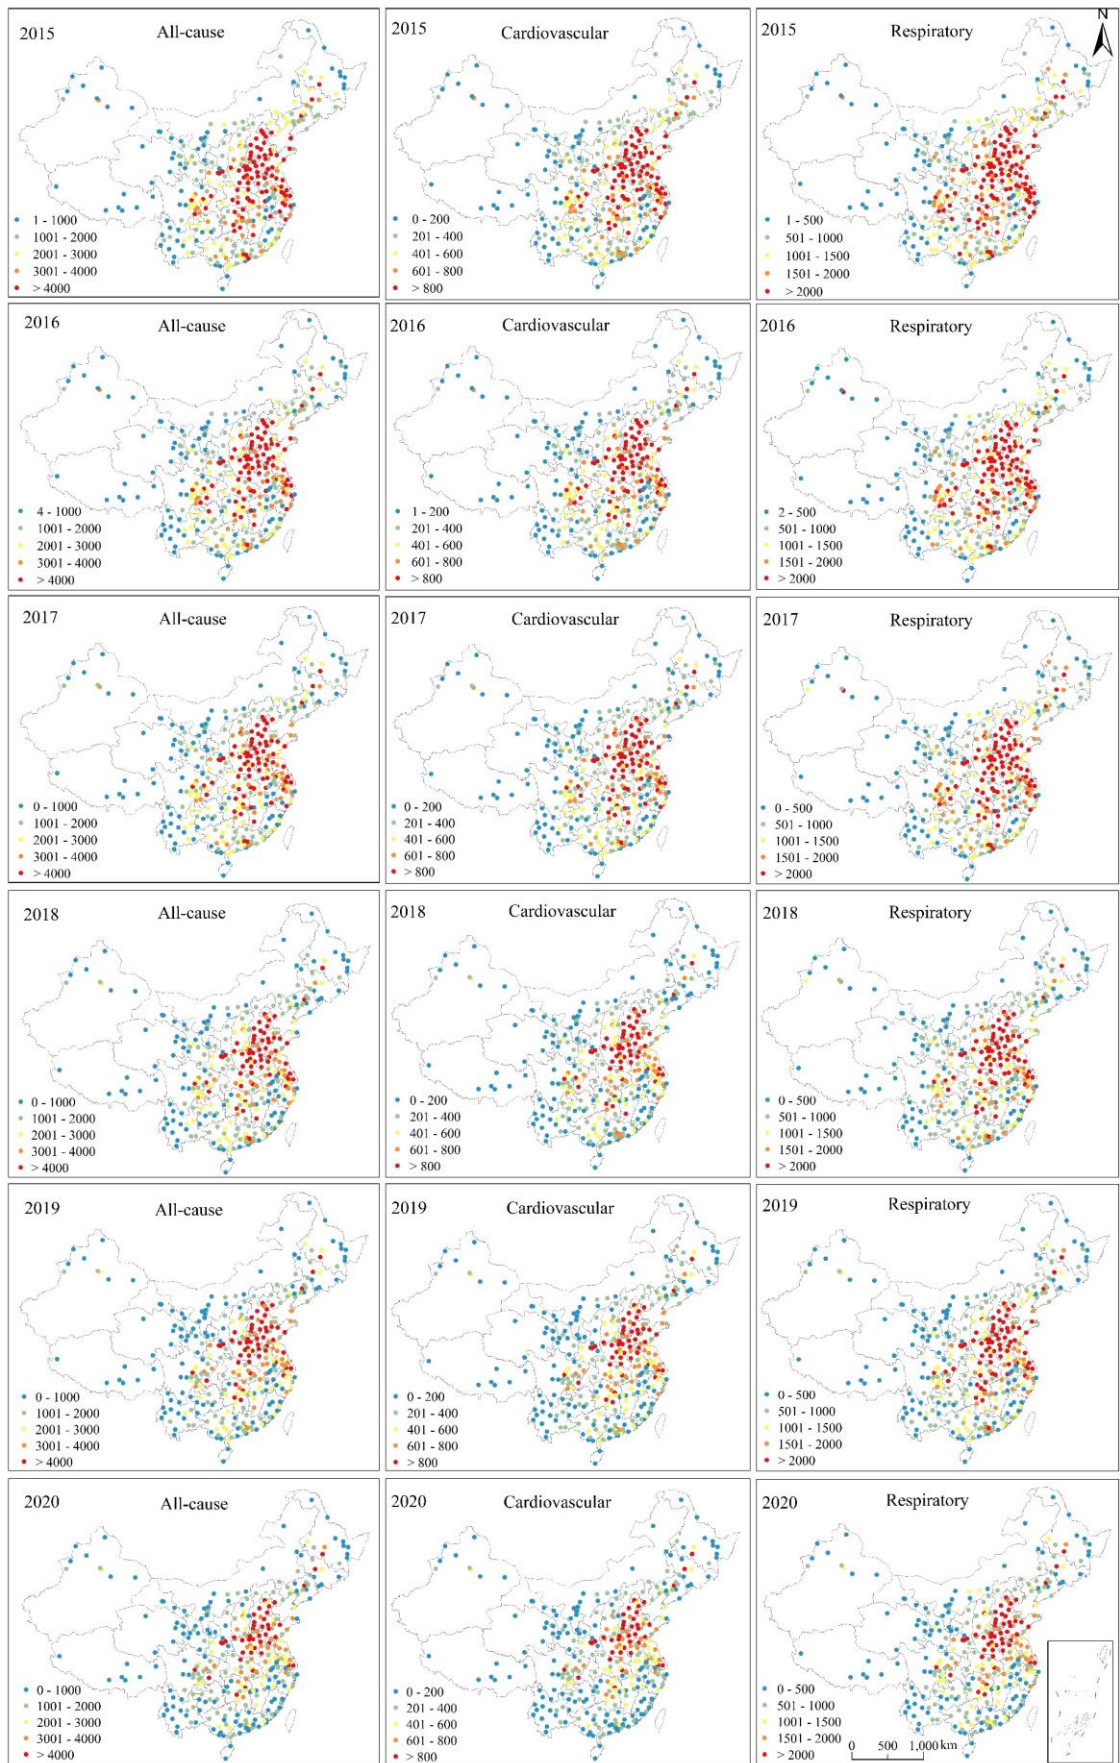

**Figure S3.** Spatiotemporal distributions of total mortality, cardiovascular mortality, and respiratory mortality caused by long-term PM<sub>2.5</sub> exposure.

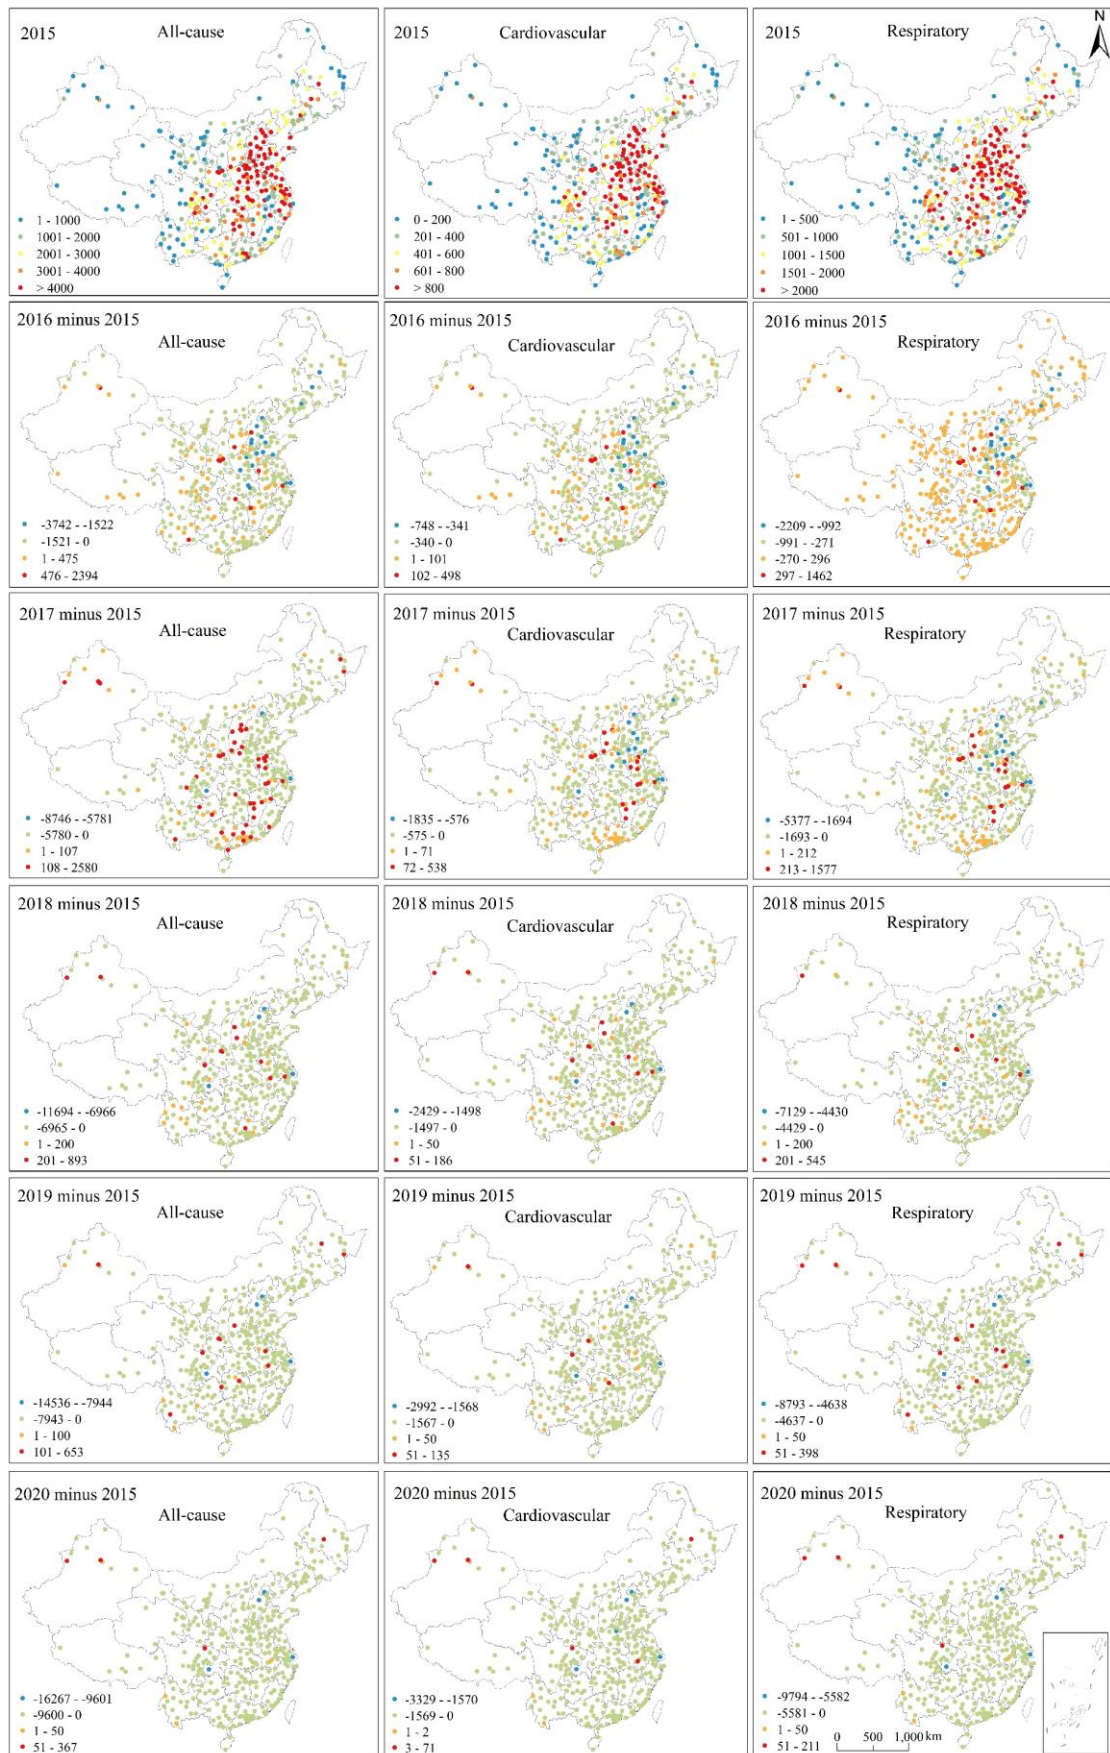

**Figure S4.** Spatiotemporal distribution of the differences of health impact related to long-term  $PM_{2.5}$  exposure in 2016-2020 relative to 2015.

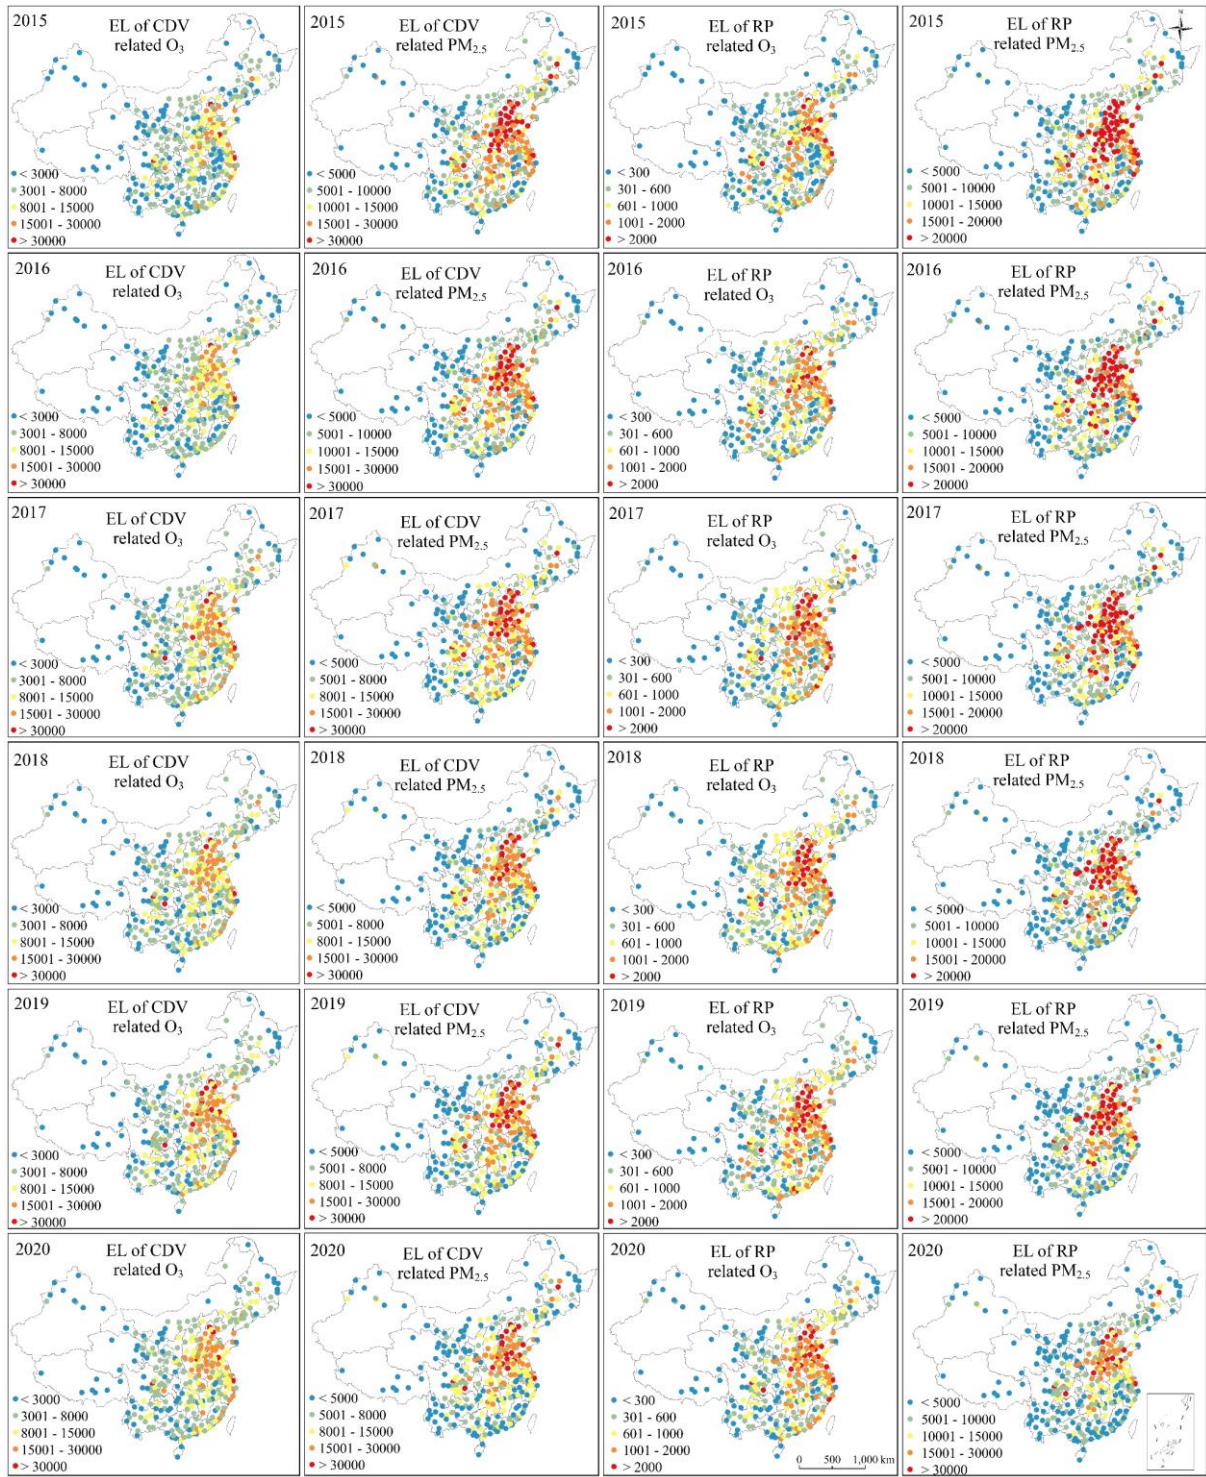

**Figure S5.** Spatiotemporal distribution of economic loss ( $10^3$ ) for cardiovascular and respiratory mortality attributable to  $O_3$  and  $PM_{2.5}$  exposure from 2015 to 2020.

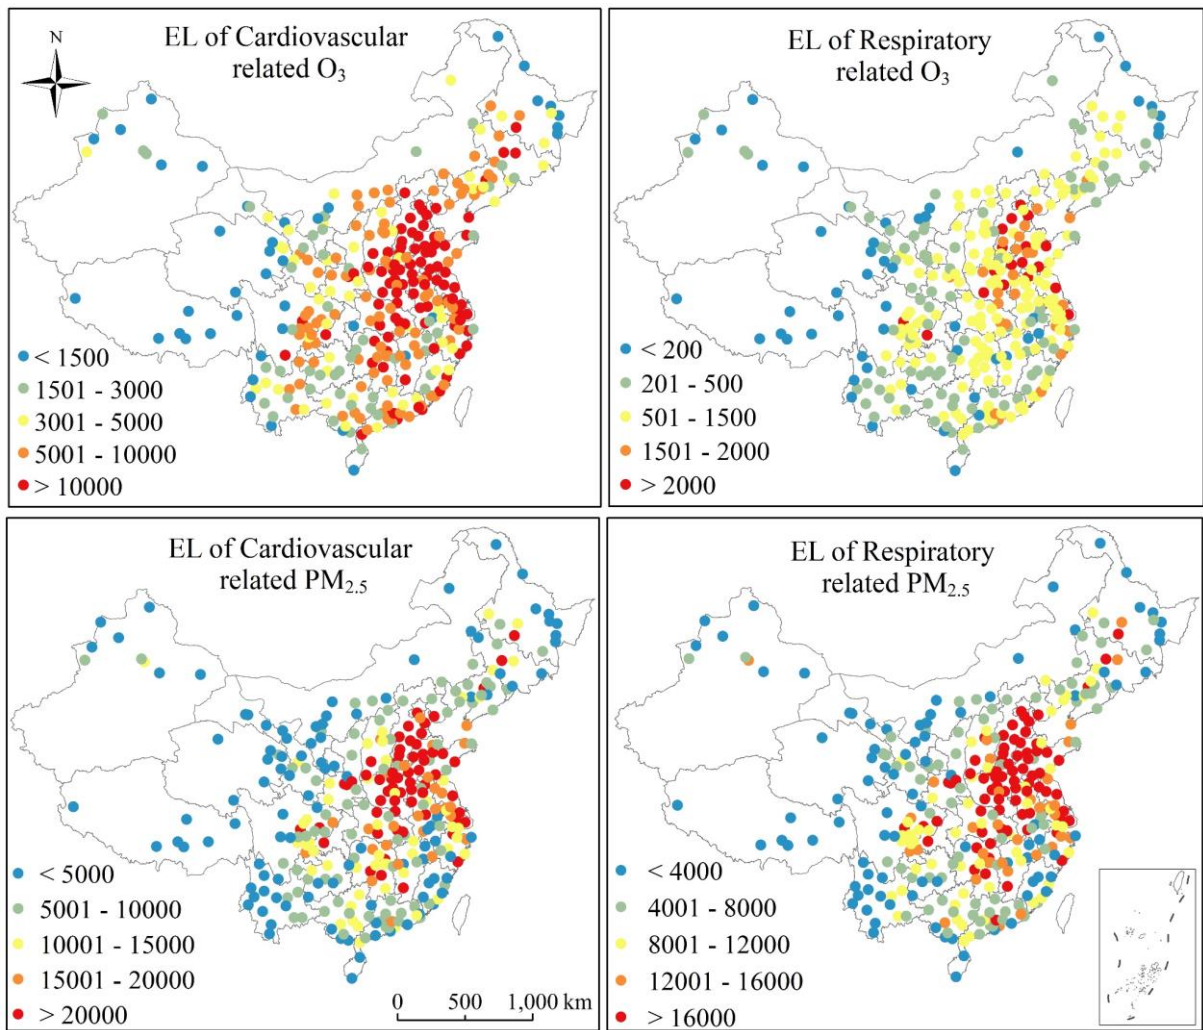

**Figure S6.** Spatiotemporal distribution of annual average economic loss ( $10^3$ ) for cardiovascular and respiratory mortality attributable to O<sub>3</sub> and PM<sub>2.5</sub> exposure during 2015-2020.
